# Supplementary material for: NEAT1 long noncoding RNA regulates transcription via protein sequestration within subnuclear bodies
Source: PubMed Central journal article supplement — Mol Biol Cell. 2014 Jan 1;25(1):169–83. doi: 10.1091/mbc.E13-09-0558 (PMC3873887; doi:10.1091/mbc.e13-09-0558), 2014-01-01
Supplement: supp_E13-09-0558v1_CombinedSupMats.pdf [file supp_E13-09-0558v1_CombinedSupMats.pdf]

# Supplemental Materials

*Molecular Biology of the Cell*

Hirose et al.

## Supplemental Figure Legends

**Figure S1. Paraspeckle enlargement upon MG132 treatment.** Paraspeckles in HeLa cells treated with DMSO or 5  $\mu$ M MG132 for 6 h were visualised by RNA-FISH of NEAT1 (magenta) as well as immunofluorescence of PSPC1 (green). The nuclei were visualized by DAPI staining. The cell images by low magnification are shown on the left. The scale bars are shown.

**Figure S2. Proteasome inhibition-dependent aggresome formation in HeLa cells.** Efficiency of MG132 treatment was assessed by observation in the electron microscope of typical aggresomes. **A.** Ultrastructure of electron-dense cytoplasmic aggregates (arrows) formed around the centrioles (arrow-heads) after 3 h of 5  $\mu$ M MG132 treatment. **B.** Detection of ubiquitin conjugates in centrioles-associated aggresomes (arrow-heads) by immunoelectron microscopy. **C.** Aggregates of ubiquitinated proteins progressively invade the cytoplasm after long-term inhibition of the proteasome (MG132 5  $\mu$ M, 17h) as revealed by I-EM with an anti-ubiquitin antibody. Bars = 1, 0.2 and 0.5  $\mu$ m in A, B and C respectively.

**Figure S3. Proteasome inhibition does not affect the location of NEAT1 lncRNA isoforms within the paraspeckles.** Portions of the NEAT1 transcripts were detected by EM-ISH with biotinylated DNA probes (red bars). DNA-RNA

hybrids were detected with an anti-biotin antibody coupled to 10 nm gold particles. For both the control (DMSO) and MG132-treated (5  $\mu$ M, 17h) HeLa cells, peripheral labelling was observed with 5' and 3'-end probes and internal labelling with the D1 probe in. Bars = 0.2  $\mu$ m

**Figure S4. Confirmation of NEAT1 knockdown with ASO.** HeLa cells were treated with ASOs that target either GFP RNA (control), or NEAT1 (#12 or #17), and total RNAs were prepared after 6, 12 and 24h and used for microarray and qRT-PCR validation. NEAT1 levels in ASO-treated cells were quantified by RT-qPCR with four primer sets (the position of the primers are shown in Figure 5B) and normalized to the level of GAPDH mRNA.

**Figure S5. Paraspeckle disruption by NEAT1 knockdown does not affect subcellular localization of ADARB2 mRNA.** **A.** Subcellular localization of ADARB2 mRNA and NEAT1 lncRNA. HeLa cells were fractionated according to the procedure shown at the top of the panel. The relative amounts of ADARB2 mRNA and NEAT1 lncRNA in each fraction were monitored by RT-qPCR. **B, C.** Subcellular distribution of ADAR1, ADARB1 and ADARB2 mRNAs were unchanged upon NEAT1 knockdown. The ASO-treated HeLa cells were fractionated into nuclear and cytoplasmic fractions as indicated at the top of panel A. The level of each ADAR mRNA was quantified by RT-qPCR (B). The

nucleocytoplasmic ratio of each ADAR mRNA in ASO-treated cells was shown in C. The ASO used (GFP, #12 and #17) are shown below.

**Figure S6. The control experiment of Figure 5A.** Levels of GAPDH mRNA were determined by RT-qPCR analyses, as in Figure 2A.

**Figure S7. NEAT1 lncRNA acts to attenuate MG132 induced apoptosis.**

Neat1<sup>-/-</sup> MEFs have an immediate sensitivity to MG132, compared to Neat1<sup>+/+</sup> MEFs, that are resistant for the first 2.5 h after MG132 addition. The calculated difference between the cell index of the control (DMSO) cells and the MG132 treated cells was graphed, using the first 4 h of data from three separate real time growth assays, each with different batches of MEFs. After MG132 addition, Neat1<sup>-/-</sup> MEFs begin to die more quickly than Neat1<sup>+/+</sup> MEFs, displaying an almost immediate difference in growth for the control compared to the MG132 treatment. In contrast, the Neat1<sup>+/+</sup> MEFs have indistinguishable growth between the two treatments over the first 2.5 h of the experiment. The error bars represent SD between the experiments.

Supplemental Fig.S1

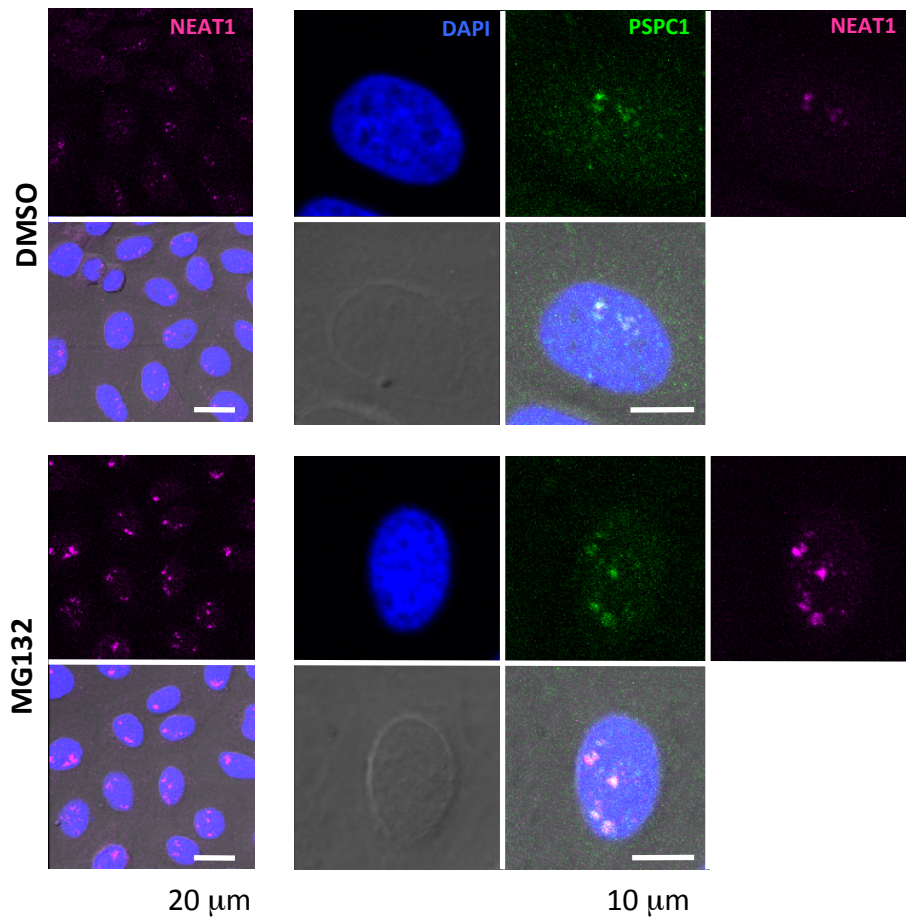

Supplemental Fig.S2

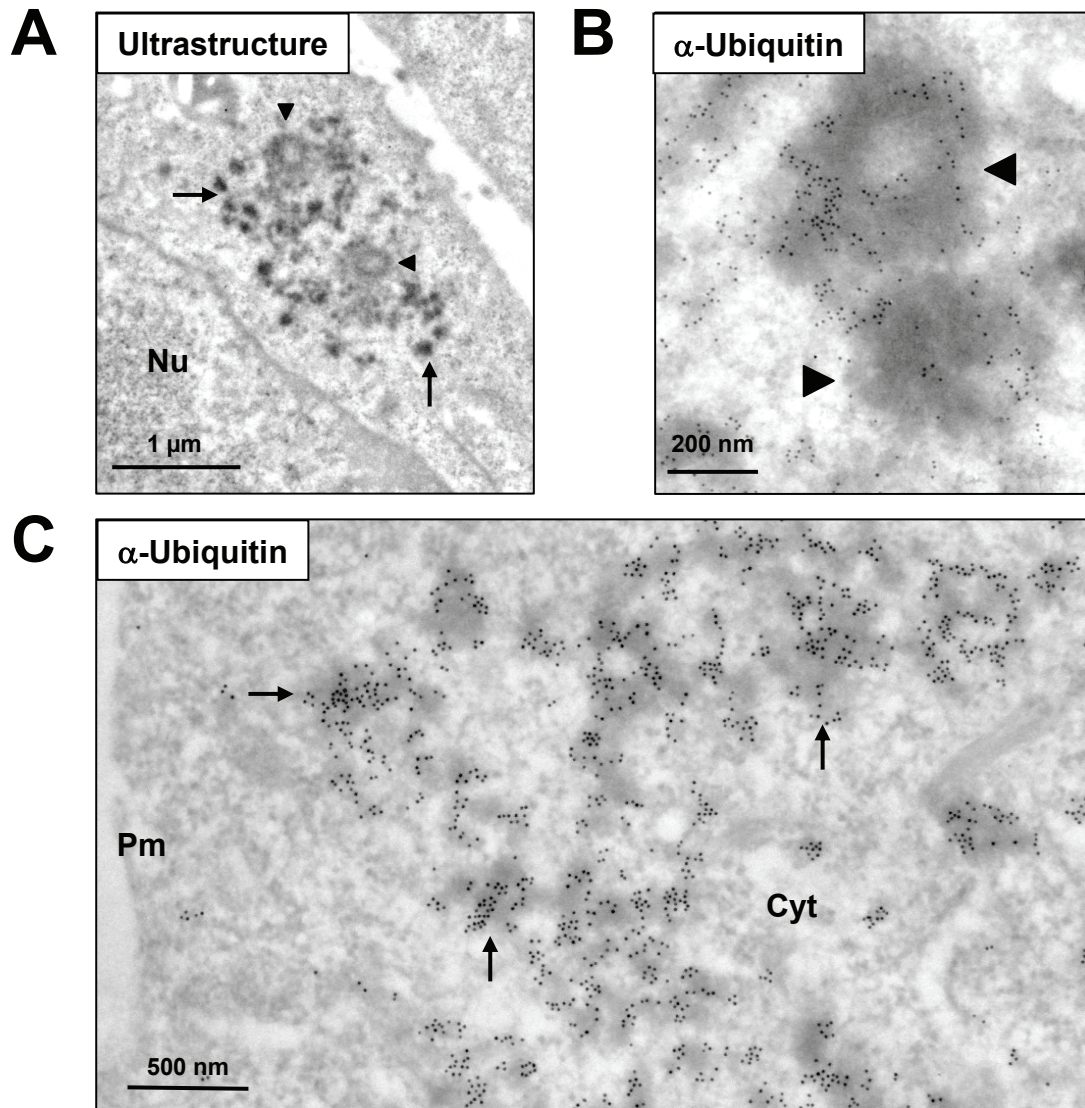

## Supplemental Fig.S3

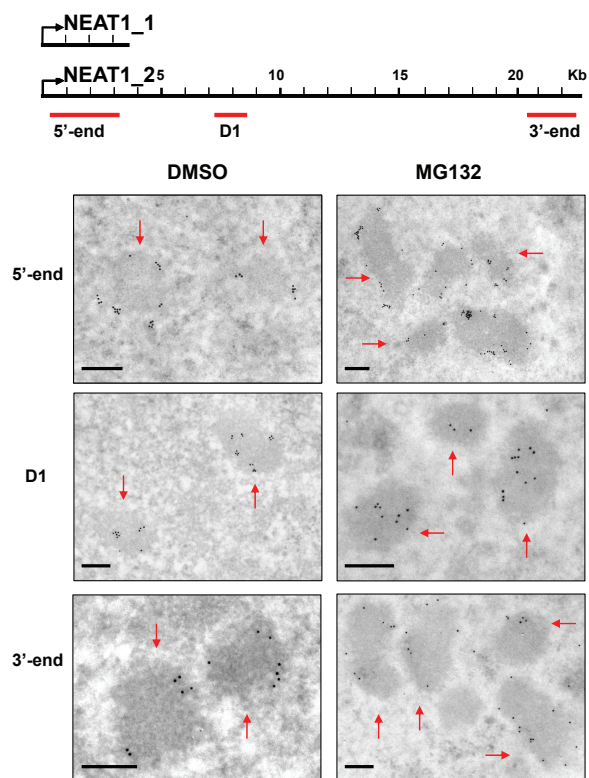

Supplemental Fig.S4

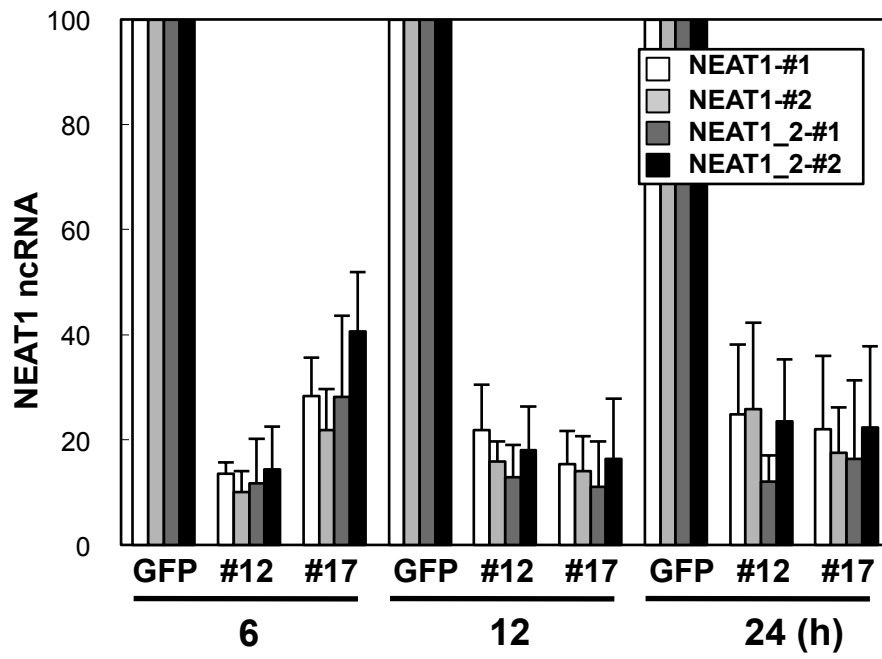



Supplemental Fig.S5

**A**

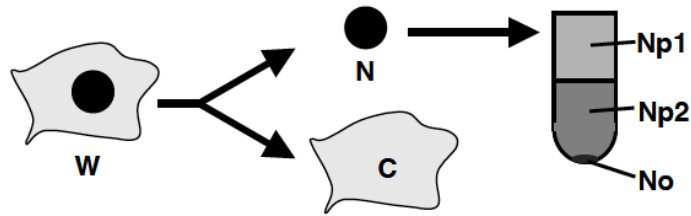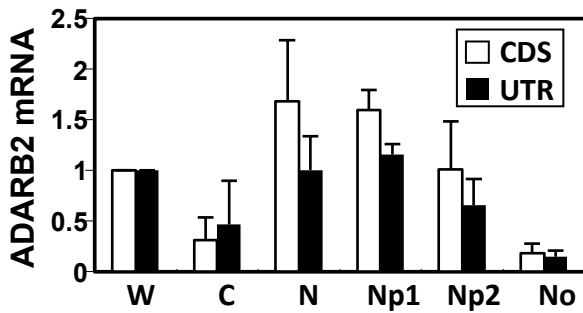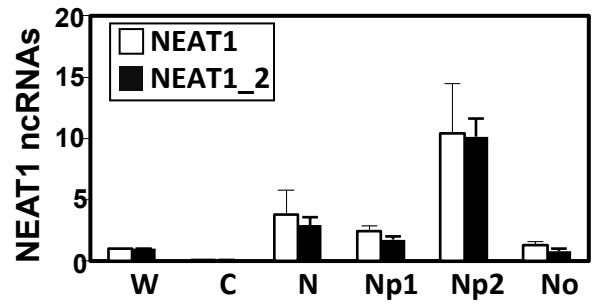

**B**

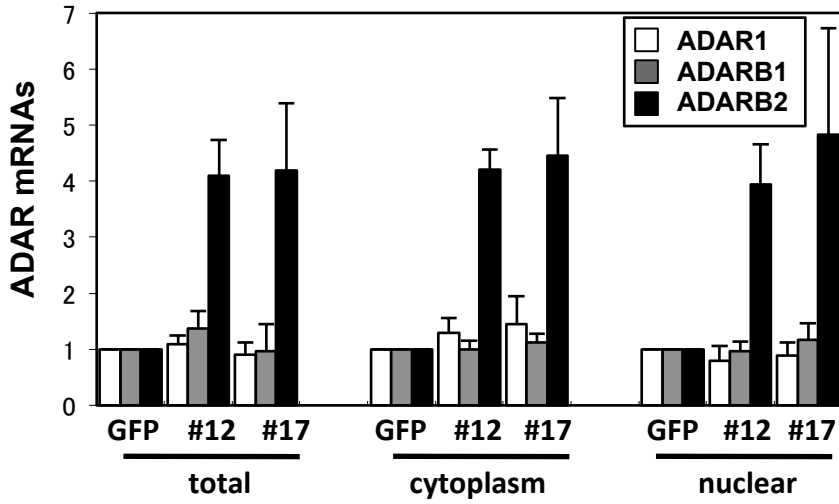

**C**

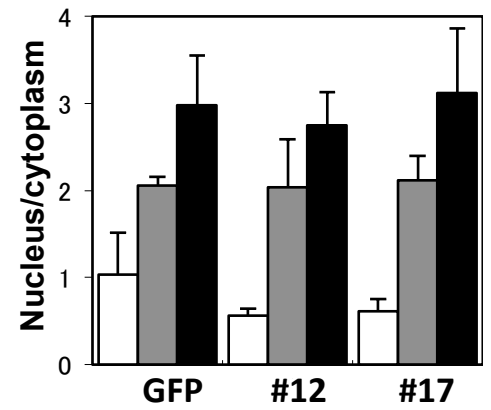

Supplemental Fig.S6

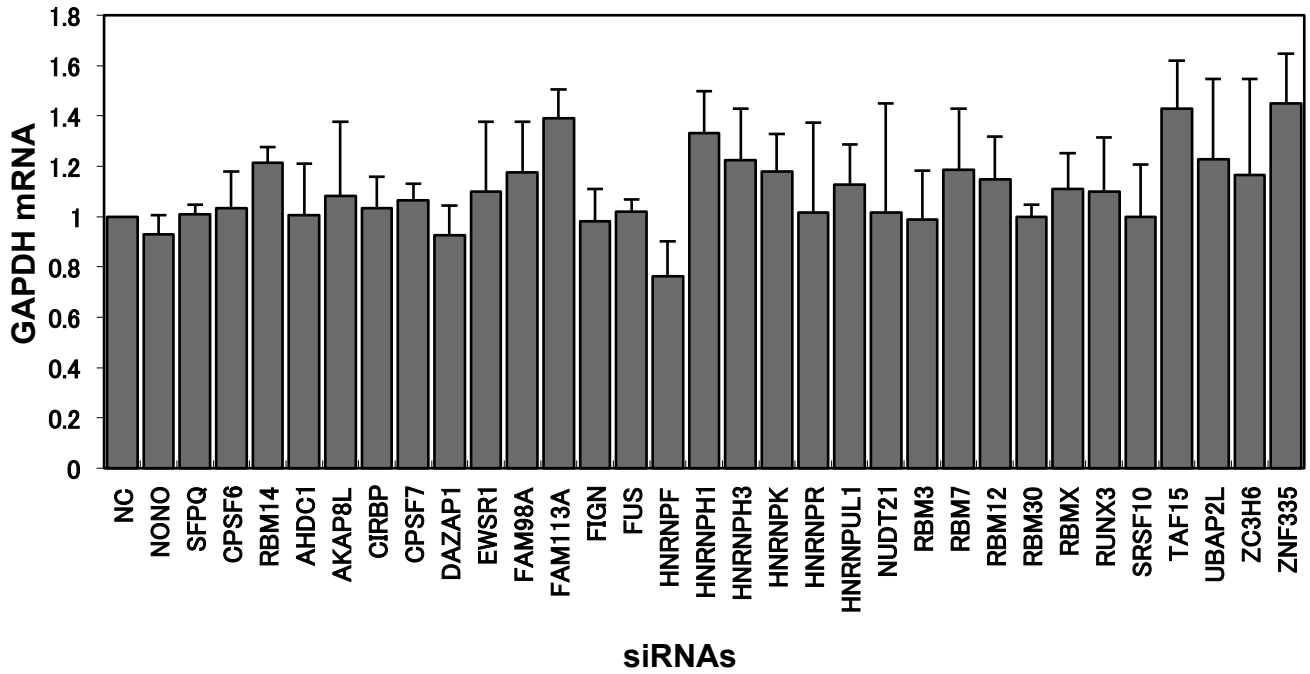

Supplemental Fig.S7

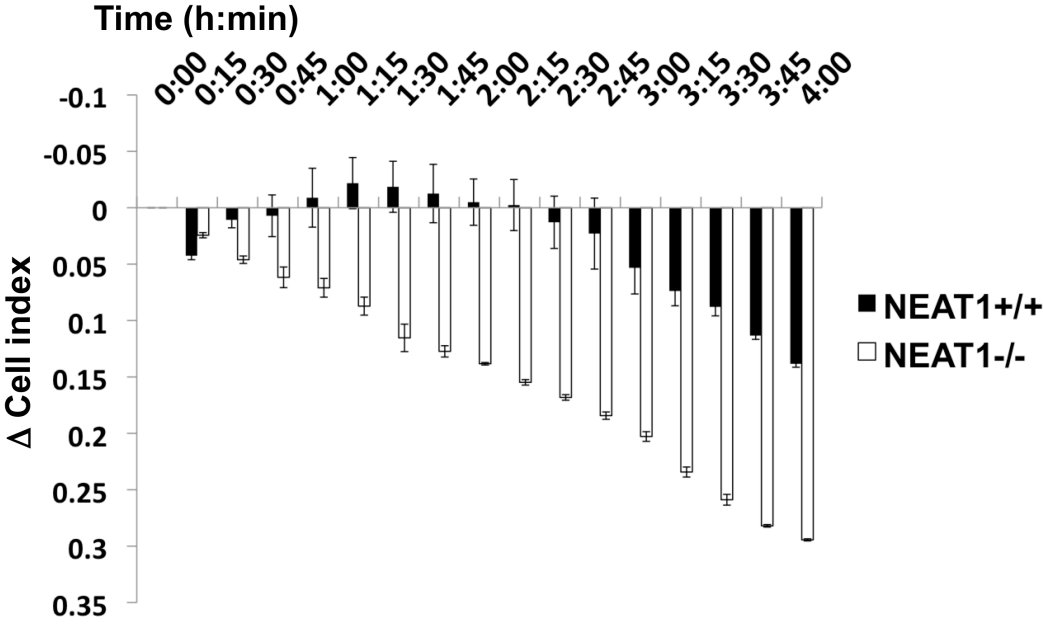

Table S1. List of genes with altered expression by NEAT1 knockdown

| Samples (h) | Genes           | Accession       | fold changes |
|-------------|-----------------|-----------------|--------------|
| 6           | CDC40           | NM_015891       | 3.76         |
| 6           | EIF4G3          | NM_003760       | 2.32         |
| 6           | SH3MD1          | NM_014631       | 2.24         |
| 6           | ADARB2          | NM_018702       | 2.12         |
| 6           | FP15737         | AF495725        | 2.09         |
| 6           | CFI             | NM_000204       | 2.07         |
| 6           | DKFZp761B039    | AL512711        | 0.50         |
| 6           | PSEN1           | AJ008005        | 0.48         |
| 6           | EMD             | NM_000117       | 0.47         |
| 6           | CYP2U1          | NM_183075       | 0.46         |
| 6           | PFKFB3          | NM_004566       | 0.45         |
| 6           | CGI-301         | AF531436        | 0.40         |
| 6           | CHMP4B          | NM_176812       | 0.39         |
| 6           | DLST            | NM_001933       | 0.35         |
| 6           | FLJ11267        | NM_019607       | 0.33         |
| 6           | LMNB1           | NM_005573       | 0.31         |
| 12          | SSH1            | NM_018984       | 3.67         |
| 12          | STARD4          | NM_139164       | 3.66         |
| 12          | RPL10 (isoform) | AY927536        | 2.24         |
| 12          | FLJ32797        | AK057359        | 2.01         |
| 12          | FLJ35102        | AK092421        | 2.01         |
| 12          | LFNG (isoform)  | ENST00000359574 | 0.50         |
| 12          | GPR157          | BC018691        | 0.46         |
| 12          | PTPRF           | NM_002840       | 0.45         |
| 12          | BC031940        | BC031940        | 0.36         |
| 24          | ADARB2          | NM_018702       | 3.56         |
| 24          | KATNAL1         | NM_032116       | 2.76         |
| 24          | SOCS2           | NM_003877       | 2.73         |
| 24          | PLAC4           | NM_182832       | 2.62         |

|    |          |              |      |
|----|----------|--------------|------|
| 24 | OVC10-2  | AF230201     | 2.24 |
| 24 | FLJ33940 | AK091259     | 0.50 |
| 24 | MATN4    | NM_003833    | 0.49 |
| 24 | FRMD4A   | NM_018027    | 0.49 |
| 24 | LGR6     | NM_001017403 | 0.47 |
| 24 | MOP-1    | AB014771     | 0.47 |
| 24 | EMILIN3  | NM_052846    | 0.44 |
| 24 | PCSK1N   | NM_013271    | 0.42 |
| 24 | FLJ12650 | NM_024522    | 0.37 |
| 24 | KLHL5    | NM_015990    | 0.37 |
| 24 | LOC90353 | NM_145232    | 0.35 |
| 24 | SP5      | NM_001003845 | 0.35 |
| 24 | LCN7     | NM_022164    | 0.30 |

Table S2. Antibodies used in this study

| Antigen           | Host   | Supplier                  | Application       | Dilution used                  |
|-------------------|--------|---------------------------|-------------------|--------------------------------|
| ADARB2            | mouse  | Santa Cruz                | WB                | 1:400                          |
| SFPQ              | mouse  | Sigma                     | WB,IF,EM, ChIP/IP | 1:2000, 1:100, 1:50, 5 $\mu$ g |
| PSPC1             | rabbit | Naganuma et al.           | IF                | 1:1000                         |
| RBM14             | rabbit | Bethyl Laboratories       | WB, IF            | 1:10000, 1:100                 |
| HNRNPK            | mouse  | Abcam                     | WB, IF            | 1:10000, 1:1000                |
| FUS               | mouse  | Santa Cruz                | WB, IF            | 1:1000, 1:1,000                |
| DAZAP1            | rabbit | Abcam                     | WB, IF            | 1:500, 1:100                   |
| HNRNPH3           | rabbit | Abcam                     | WB, IF            | 1:1000, 1:100                  |
| NONO              | Mouse  | Transduction laboratories | EM                | 1:25                           |
| CPSF6 (CFIm68)    | rabbit | Bethyl Laboratories       | EM                | 1:25                           |
| Ubiquitin         | rabbit | Dakocytomation            | EM                | 1:25                           |
| SUMO-2/3          | rabbit | Abcam                     | EM                | 1:50                           |
| SUMO-1            | mouse  | Zymed laboratories        | EM                | 1:25                           |
| PML               | rabbit | Kind gift of H. de Thé    | EM                | 1:50                           |
| RNA polymerase II | mouse  | Kind gift of H. Kimura    | ChIP              | 0.5 $\mu$ g                    |
| $\alpha$ -tublin  | rabbit | Abcam                     | WB                | 1:10000                        |

Table S3. siRNAs used in this study

| Target proteins | siRNAs  | Sense (5'-3')              | Antisense (5'-3')          |
|-----------------|---------|----------------------------|----------------------------|
| AHDC1           | PSP3#1  | CCGAUGGCACCUUUGGCCAAGGCUU  | AAGCCUUGGCCAAAGGUGCCAUCGG  |
|                 | PSP3#2  | GCUCCCGAGCUUGAUGGCAAGCAUU  | AAUGCUUGCCAUCAAGCUCGGGAGC  |
| AKAP8L          | PSP4#1  | CCAGAAUUAACCAGCGCUUAGAUAU  | AUAUCUAAGCGCUGGUUAAUUCUGG  |
|                 | PSP4#2  | GCCGCAUUUGGAGACAGACAUGAUG  | CAUCAUGUCUGUCUCCAAUUGCGGC  |
| CIRBP           | PSP6#2  | GGAGGCUCCAGAGACUACUUAUAGCA | UGCUAUAGUAGUCUCUGGAGCCUCC  |
|                 | PSP6#3  | UCCUACAGAGACAGUUACGACAGUU  | AACUGUCGUAACUGUCUCUGUAGGA  |
| CPSF7           | PSP7#1  | UCAGAAGGAGUGGACUUGAUUGAUA  | UAUCAAUCAAGUCCACUCCUUCUGA  |
|                 | PSP7#3  | GGCCCAUUCCCAGAUUCUAGUGAU   | AUCACUAGAUAUCUCGGAAUUGGGCC |
| DAZAP1          | PSP8#1  | CCAAGAGACUCUGCGCAGCUACUUU  | AAAGUAGCUGCGCAGAGUCUCUUGG  |
|                 | PSP8#3  | UGUGGUGAGACAGAGCUCAGGGAU   | AUUCUUGAGCUCUGUCUCACCACA   |
| EWSR1           | PSP10#1 | AUAGGUGUUCUGCUGAGAGUAACUG  | CAGUUAUCUCAGCAGAACACCUAU   |
|                 | PSP10#2 | AAAGAAGUCUGCCAGAUCAUCUAGA  | UCUAGAUGAUCUGGCAGACUUCUUU  |
| FAM98A          | PSP11#1 | CCCAUUGUUGGAAGAUGGAGCGCUU  | AAGCGCUCCAUCUCCAACAUGGG    |
|                 | PSP11#2 | GGGAGAUGAACUGCCCGUUAUCUUUC | GAAAGAUACGGGCAGUUAUCUCCC   |
| FAM113A         | PSP12#2 | GCCACCUCCAUAUCCUGGCCCUAAU  | AUUAGGGCCAGGAUUGGAGGUGGC   |
|                 | PSP12#3 | CGCUGCGAAGCGACAUGGUCCACUU  | AAGUGGACCAUGUCGCUUCGCGCG   |
| FIGN            | PSP13#1 | CCCUCUUCUACAGUACUGCUAAA    | UUUAGCAGUACUGUAGGAAGGAGGG  |
|                 | PSP13#3 | CCCGUUAUUAUUAAGACUUUGAAA   | UUUCAAGUCUUGAUUAGUAACGGG   |
| FUS             | PSP14#2 | CGGGACAGCCCAUGAUUAAUUUGUA  | UACAAUUAAUCAUGGGCUGUCCCG   |
|                 | PSP14#3 | GGUAAAGAAUUCUCCGAAAUCCUA   | UAGGAUUUCCGGAGAAUUCUUUACC  |
| HNRNPA1         | PSP15#1 | AUGAAGAGCUUCCUCAGCUGUUCGG  | CCGAACAGCUGAGGAAGCUCUUCAU  |
|                 | PSP15#2 | UUCAGUGUCUUCUUUAAUUGCCACCA | UGGUGGCAUUAAGAAGACACUGAA   |
| HNRNPA1L2       | PSP16#1 | GGCAGUUAUUAAGAAGCAGUGAA    | UUCACGUGCUUCUUUAGUAACUGCC  |
|                 | PSP16#2 | CACCUUCACUUUGGGAUUGGAAUU   | AAUCCAUAUCCCAAAGUGAAGGUG   |
| HNRNPF          | PSP17#2 | GCUAUGUCCAAGACAGGGCCAUA    | UAUUGGCCUGUCUUUGGACAUAGC   |
|                 | PSP17#3 | GAACUUGGAUCAGAAGAUGAUGUAA  | UUACAUCAUCUUCUGAUCCAAGUUC  |
| HNRNPH1         | PSP18#1 | GAACUUGAAUCAGAAGAUGAAGUCA  | UGACUUAUCUUCUGAUUCAAGUUC   |
|                 | PSP18#3 | GGGUGUUGAAGCAUACUGGUCCAAA  | UUUGGACCAGUAGCUUCAACACCC   |
| HNRNPH3         | PSP19#2 | CCACUAAUCCAUAACGAGUUAUA    | UAUGAACUCGUUUGGAUUUAGUGG   |
|                 | PSP19#3 | GGCUACGGAAGAGAUUGGAAUGGAUA | UAUCCAUAUCUUCUUCUCCGUGGCC  |
| HNRNPK          | PSP20#2 | CCGCUCGAAUCUGAUGCUGUGGAU   | AUCCACAGCAUCAGAUUCGAGCGG   |
|                 | PSP20#3 | UCAUCAGAGUCUAGCAGGAGGAUU   | AAUUCUCCUGCUAGACUCUGAUGA   |
| HNRNPR          | PSP21#1 | GAUCCAGAAGUCAUGGCUAAGGUAA  | UUACCUUAGCCAUGACUUCUGGAUC  |
|                 | PSP21#3 | AGGAUACUUUUGGGCAACAGUGGAA  | UUCACUGUUGCCAUAGUAUCCU     |
| HNRNPUL1        | PSP22#2 | GCCCAGCAGUGGAACCAGUACUAUC  | GAUAGUACUGGUUCCACUGCUGGGC  |
|                 | PSP22#3 | GGGAACUACGACUACGGGAGCUACU  | AGUAGCUCUCCGUAUGCUAGUUC    |
| NUDT21          | PSP24#2 | UGAACCUCCUCAGUAUCCAUAUAUU  | AAUUAUUGGAUACUGAGGAGGUUCA  |
|                 | PSP24#3 | GCACCAGGAUUGGACCAUCAUUU    | AAUUGAUGGGUCCAUAUCCUGGUGC  |
| RBM3            | PSP25#2 | UCAGGAGGAAUUAACAGAGACAAUU  | AAUUGUCUCUGUAAUUUCCUCCUGA  |
|                 | PSP25#3 | GCUCUUCGUGGGAGGGCUCACUUU   | AAAGUUGAGCCUCCACGAAGAGC    |
| RBM4B           | PSP26#1 | GGUUUUGGGCCAGAGUGAAUUUAU   | AUAAUUCACUCUCUGGCCAUAAACC  |
|                 | PSP26#3 | GCAUAUGGAGCACUCGACUACUAUA  | UAUAGUAGUCGAGUGCUCCAUAUGC  |
| RBM7            | PSP27#2 | CAAACAUGAAGUGUCUGUCCUUAU   | AUAAGGAACAGACACUUAUGUUUG   |

|        |          |                            |                           |
|--------|----------|----------------------------|---------------------------|
|        | PSP27#3  | UCACAGCGUAAAGUCAGAAUGAAUU  | AAUUCAUUCUGACUUUACGCUGUGA |
| RBM12  | PSP28#1  | GCUUUGAAACGAAACAGAAUGCUGA  | UCAGCAUUCUGUUUCGUUUCAAAGC |
|        | PSP28#2  | UGCCACUGAUGAAGAUGCAAGGCUU  | AAGCCUUGCAUCUUAUCAGUGGCA  |
| RBMX   | PSP29#2  | GCAGAUCCGCCAGGAAAGCUCUUCA  | UGAAGAGCUUUCUGGGCGAUCUGC  |
|        | PSP29#3  | CCAAGUUCUCGUGAUACUAGAGAUU  | AAUCUCUAGUAUCACGAGAACUUGG |
| RUNX3  | PSP30#2  | CCCUGACCAUCACUGUGUUCACCAA  | UUGGUGAACACAGUGAUGGUCAGGG |
|        | PSP30#3  | UCACUCAGCACCCACAAGCCACUUCA | UGAAGUGGCUUGUGGUGCUGAGUGA |
| SRSF10 | PSP31#1  | CCGACGACACCAGGUCUGAAGACUU  | AAGUCUUCAGACCUGGUGUCGUCGG |
|        | PSP31#3  | CAACUAUAGAAGAUUCGUUAGUCCU  | AGGACUAUACGAUCUUCUAUAGUUG |
| SS18L1 | PSP32#1  | CCAUCCAGAAGAUGCUGGACGAGAA  | UUCUCGUCCAGCAUCUUCUGGAUGG |
|        | PSP32#2  | GCCACGAUCGCAGACUCCAACCAGA  | UCUGGUUGGAGUCUGCGAUCUGGCG |
| TAF15  | PSP33#1  | CCUUUGCCACUAGAAGACCUGAAUU  | AAUUCAGGUCUUCUAGUGGCAAAGG |
|        | PSP33#2  | GCUCAUUAAGCCAGCAACCAUUAUA  | UUUAUUGGUUGCUGGCUUAUUGAGC |
| UBAP2L | PSP34#2  | CCCGCCACAAGUAUUGGUUAUGAU   | AUCAUAACCAUUAUCUUGUGGCGGG |
|        | PSP34#3  | CAACACUGGCCACUUUGAACCCAGAU | AUCUGGUUCAAGUGGCCAGUGUUG  |
| ZC3H6  | PSP35#1  | GGGAUCCAGGAAAUUGAGAGGGAA   | UUCCUCUCAAUUUCUGGGGAUCC   |
|        | PSP35#2  | GCAUCAUGCAAUUGCUGGCACUAAU  | AUUAGUGCCAGCAUUUGCAUGAUGC |
| ZNF335 | PSP36#1  | AGACAGCCUUGGAUCUUCUGCUGAA  | UUCAGCAGAAGAUCCAAGGCUGUCU |
|        | PSP36#2  | AGGAAGCCGCCUACAUCCAAGAGAU  | AUCUCUUGGAUGUAGGCGGCUUCCU |
| TARDBP | TARDBP#2 | UGAGCCCAUUGAAAUACCAUCGGAA  | UUCCGAUGGUUUUCAAUGGGCUCA  |
|        | TARDBP#3 | GACAGAUGCUCUACUACGAGUGAAA  | UUUCACUGCUGAUGAAGCAUCUGUC |
| CPSF6  | CPSF6#1  | UCCGCAUGUGAACCCAGCUUUCUUU  | AAAGAAAGCUGGGUUCACAUCGGGA |
|        | CPSF6#2  | ACUJCAUGGUCAGAAUCCUGUUGUA  | UACAACAGGAUUCUGACCAUGAAGU |
| NONO   | NONO#1   | GGGAACAGGGUUACUGUAUACUGAA  | UUCAGUAUACAGUAACCCUGUCCCC |
|        | NONO#2   | CAGUAGCUCUJAGACUCGCCUAUCU  | AGAUAGGCGAGUCUAAGAGCUACUG |
| PSPC1  | PSPC1#2  | GCAGGUUGAUAGAAACAUCTT      | GAUGUUUCUAUCAACCCUGCTC    |
|        | PSPC1#3  | GCUAGGCAUGAACACCAAUTT      | AUUGGUUGUUCUGCCUAGCTG     |
| RBM14  | RBM14#1  | AGUCUGCAGCCUCCUCACUAGCUUA  | UAAGCUAGUGAGGAGGCUGCAGACU |
|        | RBM14#3  | CCAAGGCCUCUUAUACUUGGAAGA   | UCUCCAAGUAUUAAGAGGCCUUGG  |
| SFPQ   | SFPQ#14  | CAGUCAUUGUGGAACCAUUGAACA   | UGUUCAAGUGGUUCCACAAGACUG  |
|        | SFPQ#19  | CCCUAUGGUUCAGGAGGCCAGAAAU  | AUUUCUGGCCUCCUGAACCAUAGGG |



Table S4. ASOs used in this study

| ASO for knockdown | Sequence (5'-3')                                   |
|-------------------|----------------------------------------------------|
| GFP               | mU*mC*mA*mC*mC*T*T*C*A*C*C*T*T*mC*mC*mA*mC*mU      |
| NEAT1#12          | mC*mC*mC*mU*mC*T*A*G*T*C*T*T* G*G*C*mU*mC*mA*mU*mU |
| NEAT1#17          | mC*mC*mC*mU*mU*C*T*C*C*T*A*G* T*A*A*mU*mC*mU*mG*mC |

\*Phosphorothioate backbone; N and mN represent deoxynucleotide and 2'-O-methylribonucleotide, respectively.

Table S5. PCR primers used in this study

| Primers                       | Direction | Sequence (5'-3')             |
|-------------------------------|-----------|------------------------------|
| <b>qRT-PCR</b>                |           |                              |
| ADARB2-CDS                    | forward   | ATATTCGTGCGGTTAAAAGAAGGTG    |
|                               | reverse   | ATCTCGTAGGGAGAGTGGAGTCTTG    |
| ADARB2-UTR                    | forward   | GCCATCCCACATACCTCCAA         |
|                               | reverse   | GGGGTGCTACTGCCTCTCCT         |
| ADAR1                         | forward   | CTTCTGAGATTCTTTCCTTGTGATCTG  |
|                               | reverse   | AACTCCTACCCTTACAAATGTTTCACC  |
| ADARB1                        | forward   | CCTTTGTTTGTGCATGTCTGTGGAG    |
|                               | reverse   | AGAGGCATTAGGAAACTGAACGAAAG   |
| SLC7A2-CDS                    | forward   | ACAAGTCTTCTTGGATCCATTTTCC    |
|                               | reverse   | GTGTCTTCGTTTTGGAATTGATTG     |
| SLC7A2-UTR                    | forward   | TGTTCCGAGATTACAGAACATCACA    |
|                               | reverse   | CAGTTGCTTGAAGCGTATTAGGAGA    |
| mNeat1                        | forward   | TTGGGACAGTGGACGTGTGG         |
|                               | reverse   | TCAAGTGCCAGCAGACAGCA         |
| mNeat1_2                      | forward   | TCCTGCCAGTGATGAAGATG         |
|                               | reverse   | AACTGCTACCCACCGAGATG         |
| GAPDH                         | forward   | ATGAGAAGTATGACAACAGCCTCAAGAT |
|                               | reverse   | ATGAGTCCTTCCACGATACCAAAGTT   |
| <b>Primers for ChIP assay</b> |           |                              |
| -5962                         | forward   | ATGCCAGTTCAAGCATCAAAACC      |
|                               | reverse   | CTGTGAGACTCCAATTCTTCATTTTCC  |
| -5096                         | forward   | AATAAATGGGCTGGGAGTC          |
|                               | reverse   | ATGATCCTGAAATGCCAAGG         |
| -4116                         | forward   | AAGAGCAACGGCTGAAGATG         |
|                               | reverse   | ATATCCCCTTCCCTCCATCA         |
| -2924                         | forward   | TGATCTATGGAGAGACAGACATTGAAG  |
|                               | reverse   | AGTTTTCTCAATCAAGGCCAGAAAG    |
| -2049                         | forward   | AGTTTTCAGTTTTGTTTCCCCTC      |
|                               | reverse   | ATACATGAACCTTGTTCCTCCTCAAG   |
| -1788                         | forward   | CAGATACAGAAATAGGGCAACTCTGG   |
|                               | reverse   | AGCTCTCTCACTTCTCTCTGCAATAC   |
| -1183                         | forward   | ATCAGCTCAGCACATAACAACACAG    |
|                               | reverse   | TATTCATTGCCTCACATGCAACC      |
| -127                          | forward   | AGAGCCAGAAAGCAGTTGTGATTG     |
|                               | reverse   | TACTTTTGCGCCTCTGCTAGTTGTT    |
| +284                          | forward   | GCAAGTCATAGAGAACAATTCGAGAGAC |
|                               | reverse   | CACCTGCACCTGCCTCCTTC         |
| +4973                         | forward   | CTCAAGAGGAAGGGCTGGATTTACT    |
|                               | reverse   | GTCACTAGAAACCAGAGGCACTGATAC  |
| +50705                        | forward   | CCTCTGTCTCTCCATCAGCAA        |
|                               | reverse   | TCCCTGAAGCACCTTTTCTTTTATC    |

|                                   |         |                      |
|-----------------------------------|---------|----------------------|
| +55059                            | forward | GCCATCCCACATACCTCCAA |
|                                   | reverse | GGGGTGCTACTGCCTCTCCT |
| <b>Subcloning of ADARB2 probe</b> |         |                      |
| ADARB2-northern                   | forward | TCGTGCGGTTAAAAGAAGGT |
|                                   | reverse | AGTACATGGAGGGCGTGTCT |
